# Supplementary material for: Drosophila microRNA-34 Impairs Axon Pruning of Mushroom Body γ Neurons by Downregulating the Expression of Ecdysone Receptor
Source: PubMed Central journal article supplement (PMC5180235; doi:10.1038/srep39141), 2016-12-23
Supplement: srep39141-s1.pdf [file srep39141-s1.pdf]

***Drosophila* microRNA-34 Impairs Axon Pruning of Mushroom  
Body  $\gamma$  Neurons by Downregulating the Expression of  
Ecdysone Receptor**

Yen-Wei Lai<sup>1,2,3</sup>, Sao-Yu Chu<sup>1</sup>, Jia-Yi Wei<sup>1</sup>, Chu-Ya Cheng<sup>2</sup>, Jian-Chiuan Li<sup>2</sup>, Chun-Hong Chen<sup>2,3\*</sup>

and Hung-Hsiang Yu<sup>1\*</sup>

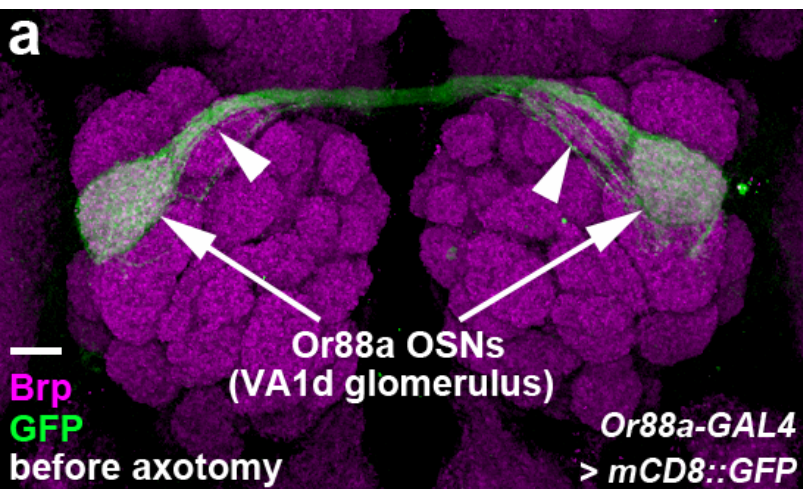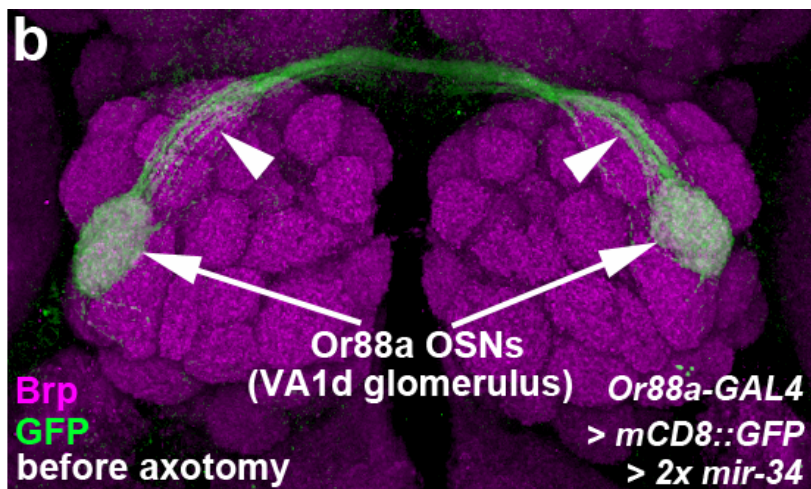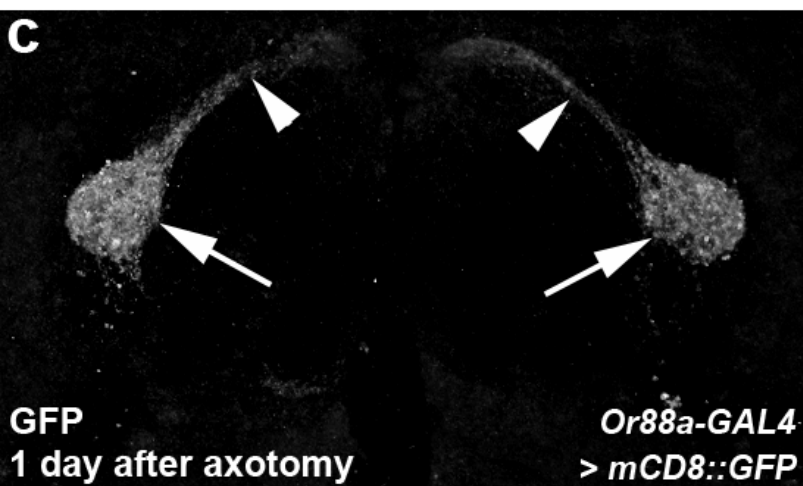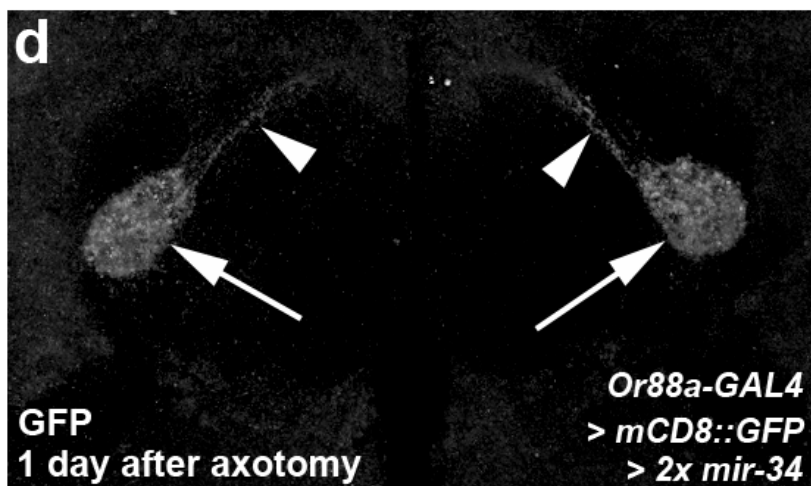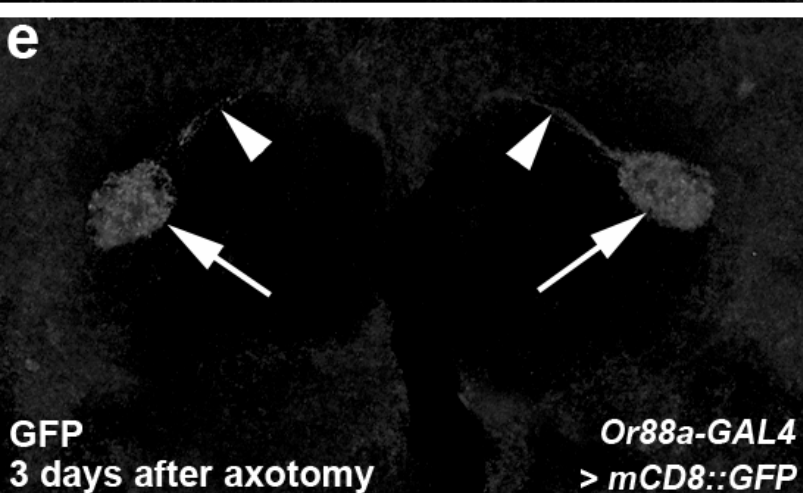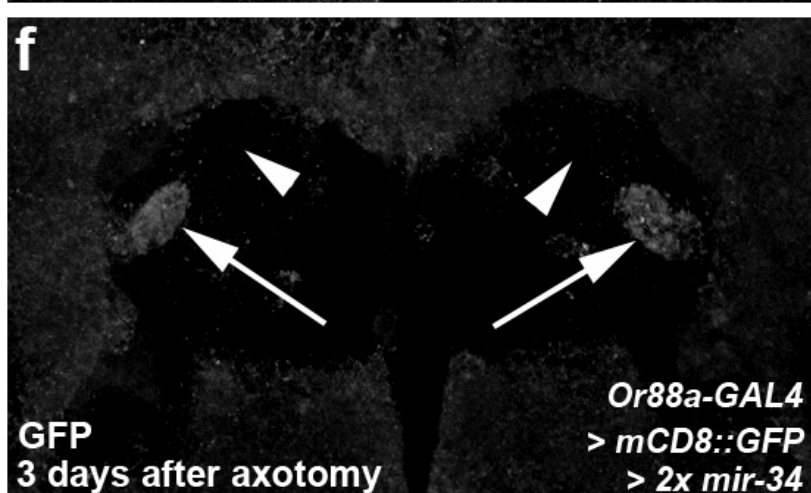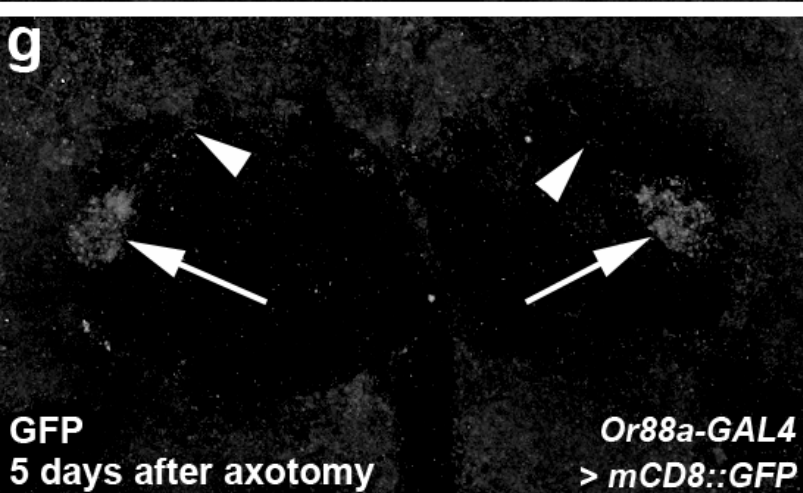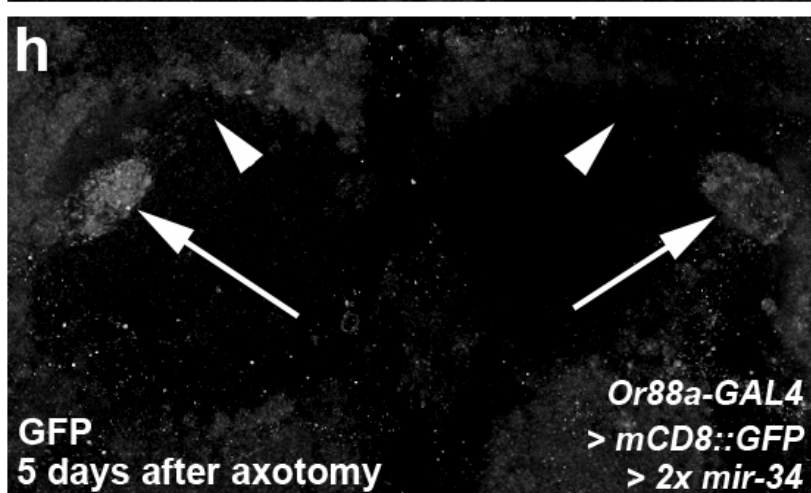

**Supplemental Figure 1. Ectopic miR-34 overexpression in olfactory sensory neurons (OSNs)**

**did not prevent axotomy-induced axon degeneration.** Confocal images show the axon degeneration phenotype of Or88a-expressing OSNs in wild-type flies (a, c, e, and g) and flies with ectopic miR-34 overexpression (b, d, f, and h) before axotomy (a [n=8] and b [n=9]) and at 1 day (c [n=16] and d [n=14]), 3 days (e [n=8] and f [n=8]), and 5 days (g [n=8] and h [n=8]) after axotomy. Bruchpilot staining (Brp; magenta, a and b) reveals the structure of the antennal lobes, and Or88a-GAL4-driven mCD8::GFP (green in a and b, or white in c-h) reveals the axonal nerves (arrows) and axonal terminals (arrowheads; innervating the VA1d glomerulus) of Or88a-expressing OSNs. (a-h) Ectopic miR-34 overexpression in Or88a-expressing OSNs did not inhibit axotomy-induced axon degeneration, as evidenced by the similarity in clearance of the axonal nerves and terminals observed in Or88a-expressing OSNs in both wild-type flies and flies with ectopic miR-34 overexpression. Fly genotypes are listed in Supplemental Table 2. Scale bar: 10  $\mu$ m for all panels.

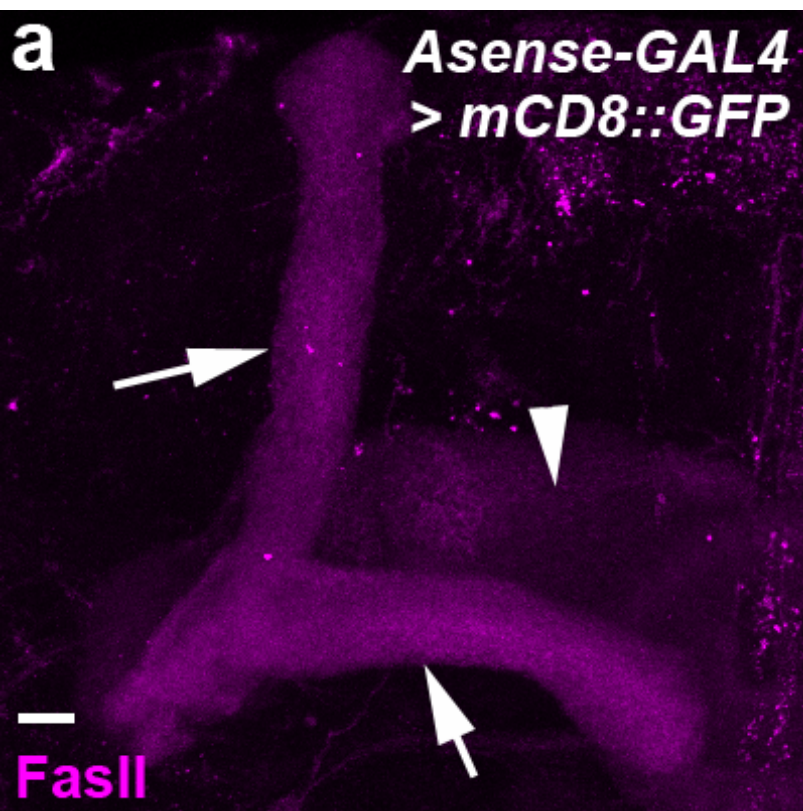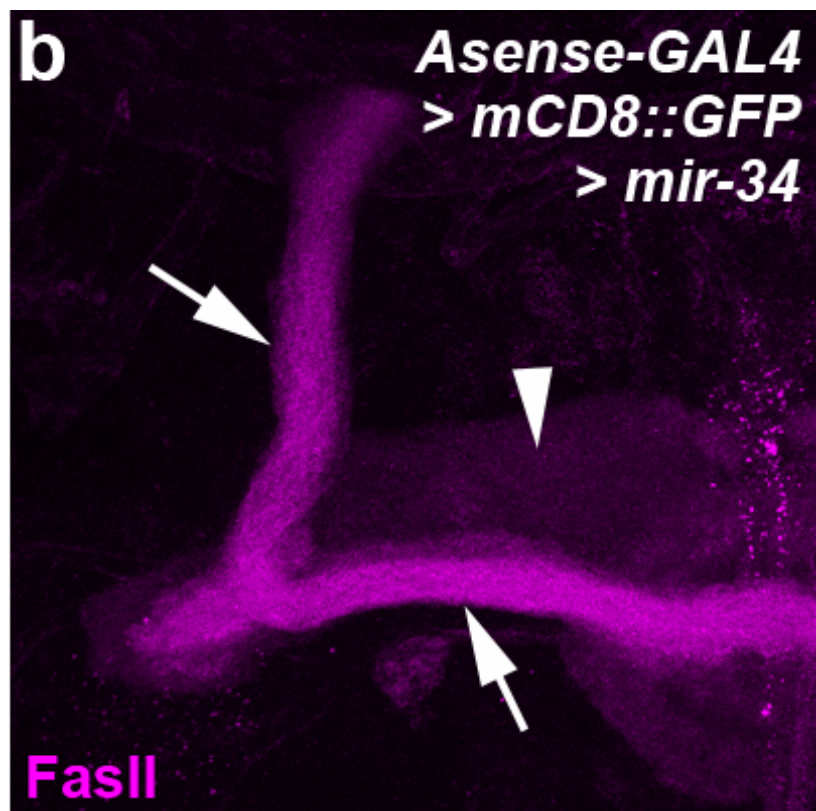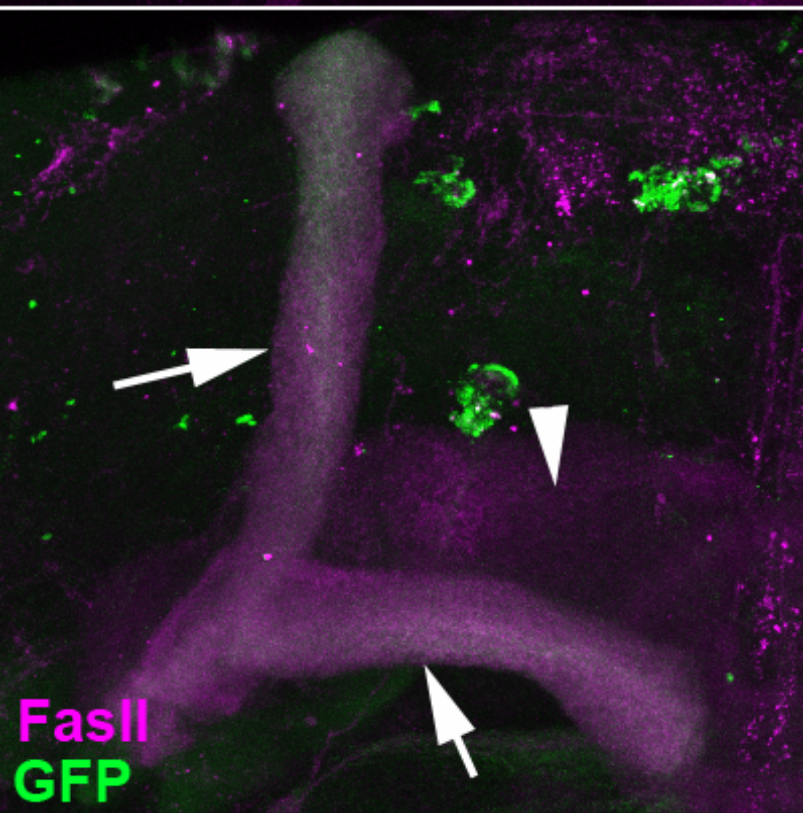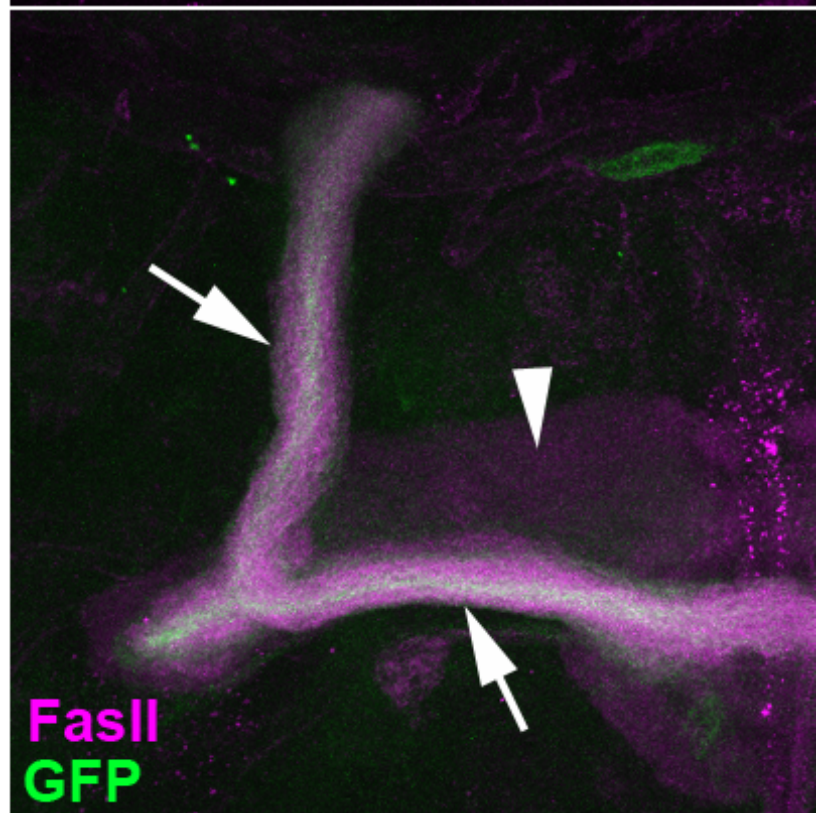

**Supplemental Figure 2. Ectopic miR-34 overexpression in neural progenitor cells and young neurons did not cause defective  $\gamma$  lobe pruning in mushroom body (MB) neurons.** Confocal images show the lobe pruning phenotype of MB neurons in wild-type flies (a) and flies with MB neurons descended from lineages in which GAL4-OK107-driven ectopic overexpression of miR-34 was restricted to neural progenitor cells and young neurons using Asense-GAL4 (b). Fasciculin II (FasII) staining (magenta) reveals the dorsal  $\alpha$  and medial  $\beta$  lobes (arrows, strong magenta staining) and the medial  $\gamma$  lobes (arrowheads, faint magenta staining) of MB neurons. In the lower panels, mCD8::GFP (GFP) expression (green) in core  $\alpha$  and  $\beta$  lobes suggest the persistence of late-stage MB  $\alpha/\beta$  neurons. (a and b) Similar to the MB neurons of wild-type flies, ectopic miR-34 overexpression restricted to neural progenitor cells and young neurons did not disrupt  $\gamma$  lobe pruning in MB neurons. Fly genotypes are listed in Supplemental Table 2. Scale bar: 10  $\mu\text{m}$  for all panels.

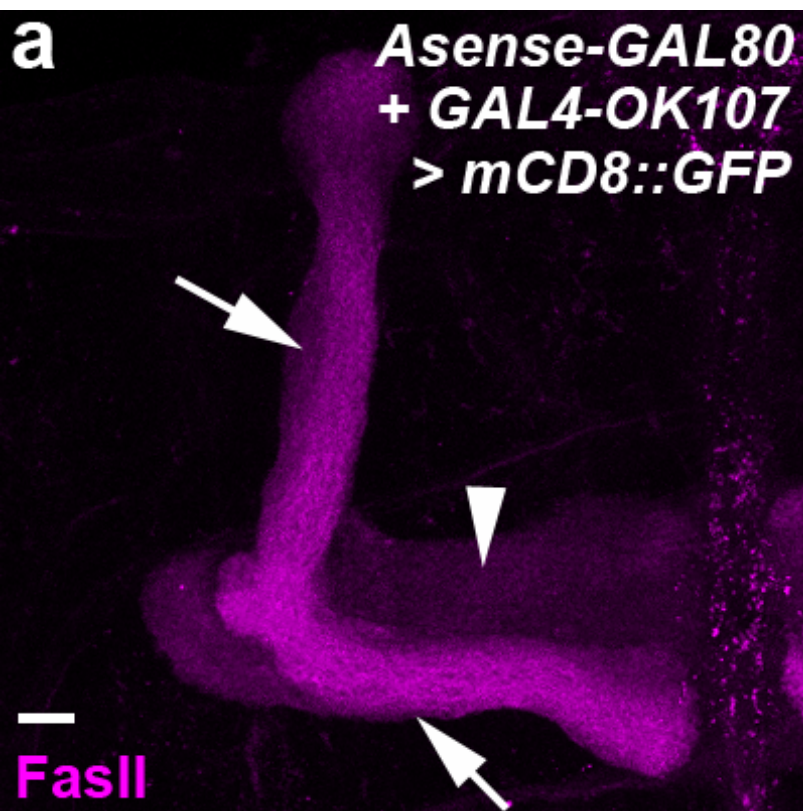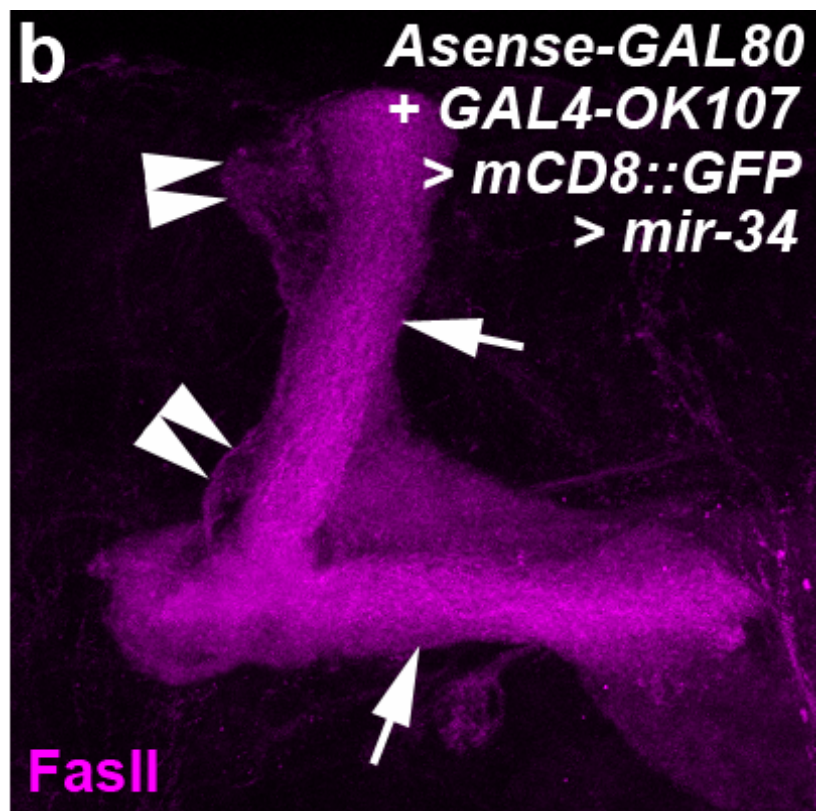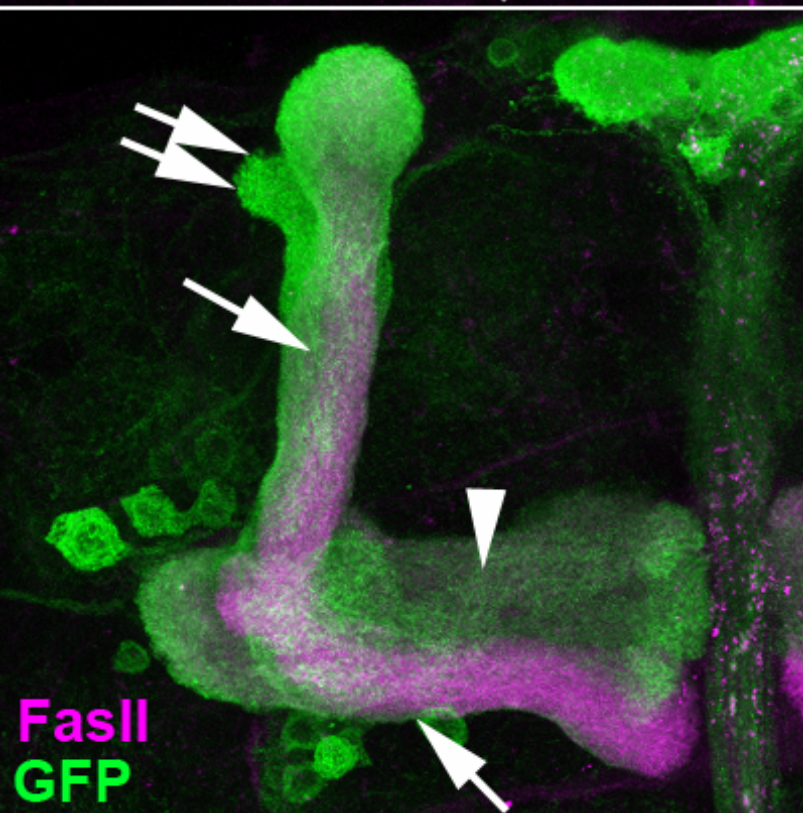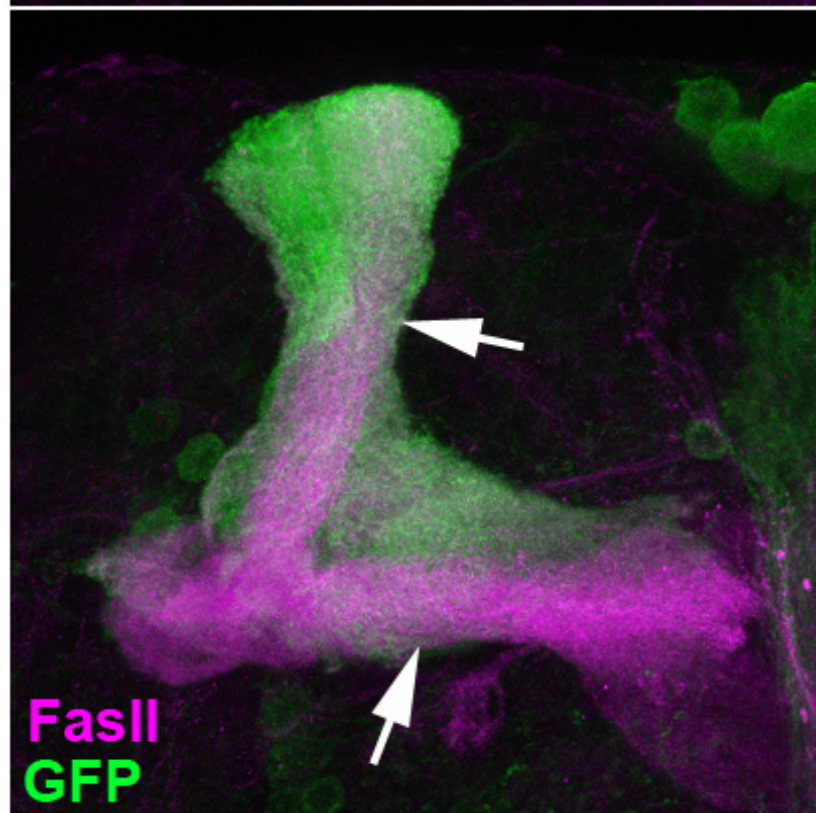

**Supplemental Figure 3. Ectopic miR-34 overexpression in differentiated MB neurons caused defective  $\gamma$  lobe pruning.** Confocal images show the lobe pruning phenotype of MB neurons in wild-type flies (a) and flies in which miR-34 was ectopically overexpressed in differentiated neurons by using GAL4-OK107 and Asense-GAL80 (b). FasII staining (magenta) reveals the dorsal  $\alpha$  and medial  $\beta$  lobes (arrows, strong magenta staining) and the medial  $\gamma$  lobes (arrowheads, faint magenta staining) of MB neurons. In the lower panels, GAL4-OK107-driven mCD8::GFP (GFP) expression (green) reveals the morphology of  $\alpha$  lobes (arrows),  $\alpha'$  lobes (double arrows), and  $\gamma$  lobes (arrowheads). (a and b) In contrast to the MB neurons in wild-type flies (a), the differentiated MB neurons in flies with ectopic miR-34 overexpression exhibited defective  $\gamma$  lobe pruning (double arrowheads, b). Fly genotypes are listed in Supplemental Table 2. Scale bar: 10  $\mu$ m for all panels.





**Supplemental Figure 4. Separate knockdown of Eip74EF, Hr4 and yem expression using RNAi did not affect  $\gamma$  lobe pruning.** (a) The Eip74EF, Hr4 and yem transcripts contain multiple miR-34 target sites. The highest-score for alignment with the miR-34 target sequence is shown. (b) A luciferase reporter gene assay was used to confirm that miR-34 silenced the expression of Eip74EF, Hr4, and yem, and miR-1 was used to normalize the relative luciferase activity for miR-34. (c-f) Confocal images show the lobe pruning phenotype of MB neurons in wild-type flies (c) and flies in which the expression of the Eip74EF, Hr4, and yem mRNA were knocked down separately using RNAi (d-f). FasII staining (magenta) reveals dorsal  $\alpha$  and medial  $\beta$  lobes (arrows, strong magenta staining) and the medial  $\gamma$  lobes (arrowheads, faint magenta staining) of MB neurons. In the lower panels, GAL4-OK107-driven mCD8::GFP (GFP) expression (green) reveals the morphology of  $\alpha$  lobe (arrows),  $\alpha'$  lobes (double arrows),  $\gamma$  lobes (arrowheads). Similar to the MB neurons in the wild-type flies (c), defective  $\gamma$  lobe pruning was not observed in MB neurons in which Eip74EF, Hr4, and yem was knocked down using RNAi. Fly genotypes are listed in Supplemental Table 2. Scale bar: 10  $\mu$ m for panels c-f.

**Supplemental Table 1. Frequencies of the  $\gamma$  lobe pruning phenotype of mushroom body neurons in the flies shown in the figures**

| <b>Manipulation (developmental stage analyzed)</b>               | <b>Total examined (n)</b> | <b>Defective <math>\gamma</math> lobe pruning rate</b> | <b>Figure</b> |
|------------------------------------------------------------------|---------------------------|--------------------------------------------------------|---------------|
| <i>GAL4-OK107&gt;mCD8::GFP</i> (6h APF)                          | 10                        | 0%                                                     | 2a            |
| <i>GAL4-OK107&gt;mCD8::GFP</i> (18h APF)                         | 10                        | 0%                                                     | 2b            |
| <i>GAL4-OK107&gt;mCD8::GFP</i> (24h APF)                         | 10                        | 0%                                                     | 2c            |
| <i>GAL4-OK107&gt;mCD8::GFP</i> (36h APF)                         | 14                        | 0%                                                     | 2g            |
| <i>GAL4-OK107&gt;mCD8::GFP</i> (48h APF)                         | 16                        | 0%                                                     | 2h            |
| <i>GAL4-OK107&gt;mCD8::GFP</i> (adult)                           | 20                        | 0%                                                     | 1a, S4c       |
| <i>GAL4-OK107&gt;mCD8::GFP&gt;1x mir-34</i> (6h APF)             | 10                        | 0%                                                     | 2d            |
| <i>GAL4-OK107&gt;mCD8::GFP&gt;1x mir-34</i> (18h APF)            | 10                        | 100%                                                   | 2e            |
| <i>GAL4-OK107&gt;mCD8::GFP&gt;1x mir-34</i> (24h APF)            | 20                        | 90%                                                    | 2f            |
| <i>GAL4-OK107&gt;mCD8::GFP&gt;1x mir-34</i> (36h APF)            | 12                        | 100%                                                   | 2j            |
| <i>GAL4-OK107&gt;mCD8::GFP&gt;1x mir-34</i> (48h APF)            | 14                        | 100%                                                   | 2k            |
| <i>GAL4-OK107&gt;mCD8::GFP&gt;1x mir-34</i> (adult)              | 20                        | 100%                                                   | 1b, 5b, 6b    |
| <i>GAL4-OK107&gt;mCD8::GFP&gt;usp RNAi</i> (adult)               | 20                        | 100%                                                   | 1c            |
| <i>GAL4-OK107&gt;mCD8::GFP&gt;EcR-B1</i> (adult)                 | 14                        | 0%                                                     | 5a            |
| <i>GAL4-OK107&gt;mCD8::GFP&gt;1x mir-34&gt;EcR-B1</i> (adult)    | 20                        | 10%                                                    | 5c            |
| <i>GAL4-OK107&gt;mCD8::GFP&gt;babo-a</i> (adult)                 | 16                        | 0%                                                     | 6a            |
| <i>GAL4-OK107&gt;mCD8::GFP&gt;1x mir-34&gt;EcR-B1</i> (adult)    | 16                        | 0%                                                     | 6c            |
| <i>GAL4-OK107&gt;mCD8::GFP&gt;2x Eip74EF RNAi</i> (adult)        | 6                         | 0%                                                     | S4d           |
| <i>GAL4-OK107&gt;mCD8::GFP&gt;2x Hr4 RNAi</i> (adult)            | 4                         | 0%                                                     | S4e           |
| <i>GAL4-OK107&gt;mCD8::GFP&gt;2x yem RNAi</i> (adult)            | 6                         | 0%                                                     | S4f           |
| <i>GAL4-201Y&gt;mCD8::GFP</i> (24h APF)                          | 20                        | 0%                                                     | 2i            |
| <i>GAL4-201Y&gt;mCD8::GFP&gt;2x mir-34</i> (24h APF)             | 20                        | 100%                                                   | 2l            |
| <i>GAL4-201Y&gt;mCD8::GFP</i> (adult; MARCM)                     | 14                        | 0%                                                     | 3a            |
| <i>GAL4-201Y&gt;mCD8::GFP&gt;1x mir-34</i> (adult; MARCM)        | 5                         | 80%                                                    | 3b            |
| <i>GAL4-201Y&gt;mCD8::GFP&gt;2x mir-34</i> (adult; MARCM)        | 13                        | 100%                                                   | 3c            |
| <i>Asense-GAL4&gt;mCD8::GFP</i> (adult)                          | 10                        | 0%                                                     | S2a           |
| <i>Asense-GAL4&gt;mCD8::GFP&gt;1x mir-34</i> (adult)             | 6                         | 0%                                                     | S2b           |
| <i>Asense-GAL80+GAL4-Ok107&gt;mCD8::GFP</i> (adult)              | 12                        | 0%                                                     | S3a           |
| <i>Asense-GAL80+GAL4-Ok107&gt;mCD8::GFP&gt;1x mir-34</i> (adult) | 20                        | 100%                                                   | S3b           |

APF, after puparium formation

**Supplemental Table 2. Genotypes of the flies in the figures**

| Figure                   | Genotype                                                                                                                                                                     |
|--------------------------|------------------------------------------------------------------------------------------------------------------------------------------------------------------------------|
| 1a, 2a-c, 2g, 2h, S4c    | <i>yw;UAS-mCD8::GFP/+;+;GAL4-OK107/+</i>                                                                                                                                     |
| 1b, 2d-f, 2j, 2k, 5b, 6b | <i>yw;UAS-mCD8::GFP/UAS-mir-34<sup>l1</sup>;+;GAL4-OK107/+</i>                                                                                                               |
| 2i                       | <i>yw;FRT<sup>G13</sup>,UAS-mCD8::GFP,GAL4-201Y/+;+;+</i>                                                                                                                    |
| 2l                       | <i>yw;FRT<sup>G13</sup>,UAS-mCD8::GFP,GAL4-201Y / UAS-mir-34<sup>l1</sup>,UAS-mir-34<sup>l2</sup>;+;+</i>                                                                    |
| 1c                       | <i>yw;UAS-mCD8::GFP/UAS-<i>usp</i> RNAi;+;GAL4-OK107/+</i>                                                                                                                   |
| 3a, 4c                   | <i>yw;hs-FLP<sup>l122</sup>/yw;FRT<sup>G13</sup>,UAS-mCD8::GFP,GAL4-201Y/+;FRT<sup>82B</sup>,<br/>tubP-GAL80/FRT<sup>82B</sup></i>                                           |
| 3b                       | <i>yw;hs-FLP<sup>l122</sup>/yw;FRT<sup>G13</sup>,UAS-mCD8::GFP,GAL4-201Y/UAS-mir-34<sup>l1</sup>;FRT<sup>82B</sup>,<br/>tubP-GAL80/FRT<sup>82B</sup></i>                     |
| 3c, 4d                   | <i>yw;hs-FLP<sup>l122</sup>/yw;FRT<sup>G13</sup>,UAS-mCD8::GFP,GAL4-201Y/UAS-mir-34<sup>l1</sup>,UAS-mir-34<sup>l2</sup>; FRT<sup>82B</sup>,tubP-GAL80/FRT<sup>82B</sup></i> |
| 4a                       | <i>yw;hs-FLP<sup>l1</sup>,UAS-mCD8::GFP/yw;+;FRT<sup>82B</sup>,tubP-GAL80/FRT<sup>82B</sup>;GAL4-OK107/+</i>                                                                 |
| 4b                       | <i>yw;hs-FLP<sup>l1</sup>,UAS-mCD8::GFP/yw;UAS-mir-34<sup>l1</sup>/+;FRT<sup>82B</sup>,tubP-GAL80/<br/>FRT<sup>82B</sup>; GAL4-OK107/+</i>                                   |
| 5a                       | <i>yw;UAS-mCD8::GFP/+;UAS-EcR-B1/+;GAL4-OK107/+</i>                                                                                                                          |
| 5c                       | <i>yw;UAS-mCD8::GFP/UAS-mir-34<sup>l1</sup>;UAS-EcR-B1/+;GAL4-OK107/+</i>                                                                                                    |
| 6a                       | <i>yw,UAS-baba-a /yw;UAS-mCD8::GFP/+;+;GAL4-OK107/+</i>                                                                                                                      |
| 6c                       | <i>yw,UAS-baba-a/yw;UAS-mCD8::GFP/UAS-mir-34<sup>l1</sup>;+; GAL4-OK107/+</i>                                                                                                |
| S1a, S1c, S1e, S1g       | <i>yw;UAS-mCD8::GFP/+;Or88a-GAL4/+;+</i>                                                                                                                                     |
| S1b, S1d, S1f, S1h       | <i>yw;UAS-mCD8::GFP/ UAS-mir-34<sup>l1</sup>,UAS-mir-34<sup>l2</sup>;Or88a-GAL4/+;+</i>                                                                                      |
| S2a                      | <i>yw;Asense-GAL4,UAS-mCD8::GFP/+;+;+</i>                                                                                                                                    |
| S2b                      | <i>yw;Asense-GAL4,UAS-mCD8::GFP/UAS-mir-34<sup>l1</sup>;+;+</i>                                                                                                              |
| S3a                      | <i>yw;UAS-mCD8::GFP/+;Asense-GAL80/+;GAL4-OK107/+</i>                                                                                                                        |
| S3b                      | <i>yw;UAS-mCD8::GFP/ UAS-mir-34<sup>l1</sup>;Asense-GAL80/+;GAL4-OK107/+</i>                                                                                                 |
| S4d                      | <i>yw;UAS-mCD8::GFP/+;UAS-Eip74EF RNAi/UAS-Eip74EF RNAi;GAL4-OK107/+</i>                                                                                                     |
| S4e                      | <i>yw;UAS-mCD8::GFP/+;UAS-yem RNAi/UAS-yem RNAi;GAL4-OK107/+</i>                                                                                                             |
| S4f                      | <i>yw;UAS-mCD8::GFP/+;UAS-Hr4 RNAi/UAS-Hr4 RNAi;GAL4-OK107/+</i>                                                                                                             |
